# Supplementary material
Source: PubMed Central journal article supplement (PMC10220121)

# **Complement Inhibition in Paroxysmal Nocturnal Hemoglobinuria (PNH): A Systematic Review and Expert Opinion from Central Europe on Special Patient Populations**

Imre Bodó<sup>1\*</sup>, Ismail Amine<sup>2</sup>, Ana Boban<sup>3</sup>, Horia Bumbea<sup>4</sup>, Alexander Kulagin<sup>5</sup>, Elena Lukina<sup>6</sup>, Agnieszka Piekarska<sup>7</sup>, Irena Preložnik Zupan<sup>8</sup>, Juraj Sokol<sup>9</sup>, Jerzy Windyga<sup>10</sup>, Jaroslav Cermak<sup>11</sup>

<sup>1</sup>Department of Internal Medicine and Hematology, Semmelweis University, Budapest, Hungary

<sup>2</sup>Department of Hematology, Tokuda Hospital Sofia, Sofia, Bulgaria

<sup>3</sup>Department of Internal Medicine, Division of Haematology, University Hospital Center Zagreb, School of Medicine University of Zagreb, Zagreb, Croatia

<sup>4</sup>Department of Hematology, Bone Marrow Transplant Unit, Emergency University Hospital, Carol Davila University of Medicine and Pharmacy, Bucharest, Romania

<sup>5</sup>RM Gorbacheva Research Institute, Pavlov University, St. Petersburg, Russia; ORCID: 0000-0002-9589-4136

<sup>6</sup>Department of Orphan Diseases, National Research Center for Hematology, Moscow, Russia

<sup>7</sup>Department of Hematology and Transplantology Medical University of Gdansk, Gdansk, Poland; ORCID: 0000-0002-1593-8005

<sup>8</sup>Department of Hematology, University Medical Centre Ljubljana, and Faculty of Medicine, University of Ljubljana, Slovenia; ORCID: 0000-0001-9933-549X

<sup>9</sup>Department of Hematology and Transfusion Medicine, Jessenius Medical Faculty in Martin, Comenius University in Bratislava, Martin, Slovakia

<sup>10</sup>Department of Hemostasis Disorders and Internal Medicine, Institute of Hematology and Transfusion Medicine, Warsaw, Poland; ORCID: 0000-0001-7877-4784

<sup>11</sup>Institute of Hematology and Blood Transfusion, Prague, Czech Republic

**Running head:** Use of anti-complement inhibitors in PNH

**\*Corresponding author:** Professor Imre Bodó

Department of Internal Medicine and Hematology,

Semmelweis University,

46 Szentkirályi u.,

Budapest 1088,

Hungary

**Tel:** +36-30-450-4483

**Email:** [bodoimre.md@gmail.com](mailto:bodoimre.md@gmail.com)

**Figure S1. Prisma Flow Diagram**

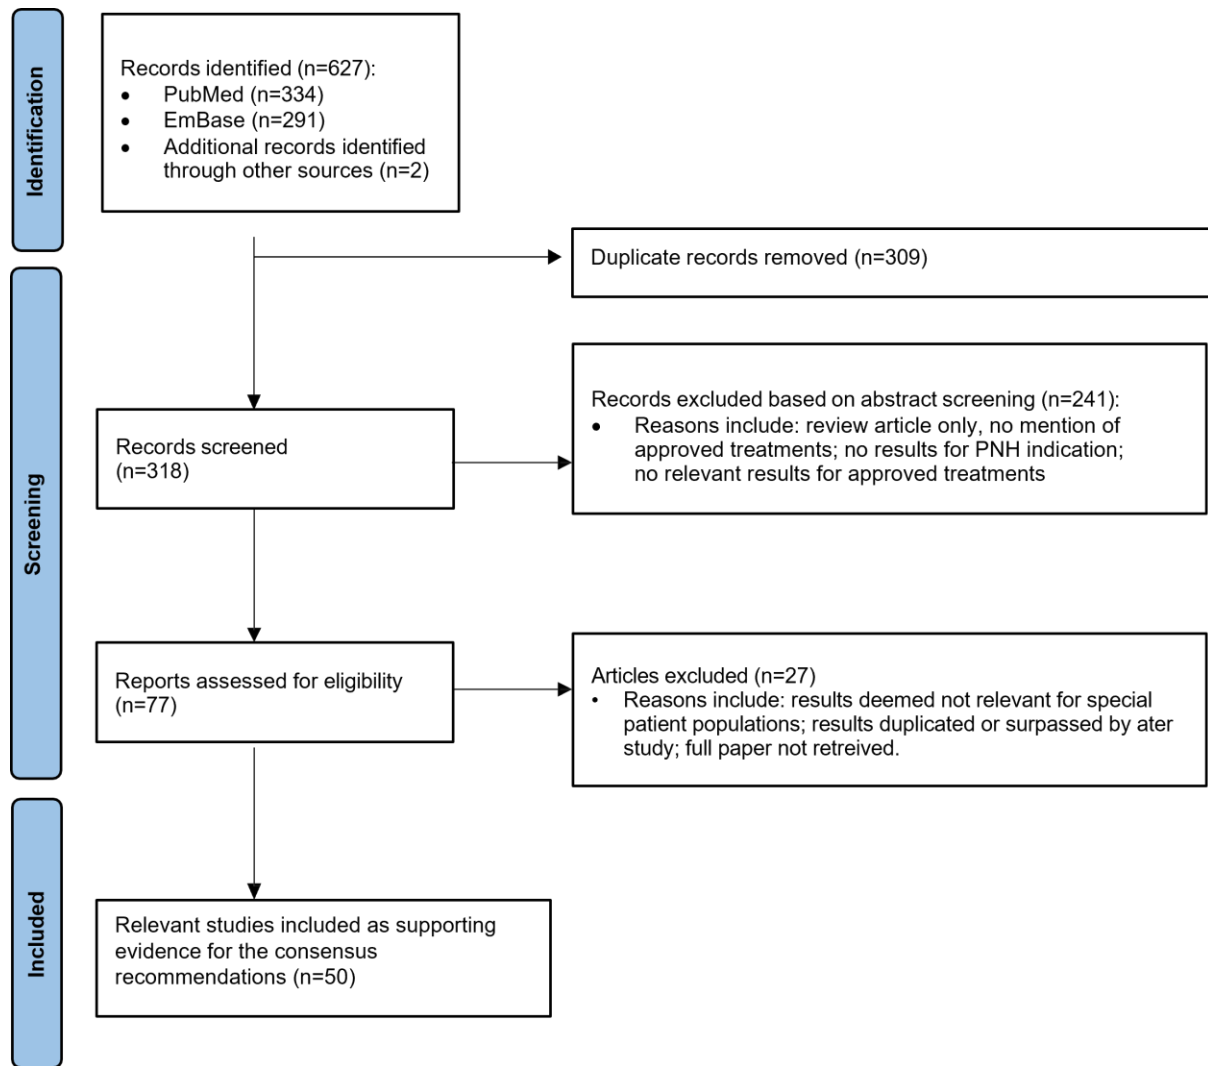

Supplement: 12325_2023_2510_MOESM1_ESM.pdf [file 12325_2023_2510_MOESM1_ESM.pdf]
